# Supplementary material for: Effect of a self-assembled 3D flower-like hierarchical architecture on the thermoelectric properties of Ag-doped Bi2S3
Source: Royal Society of Chemistry journal article supplement (doi:10.1039/d4ra04467c), 2024-01-01
Supplement: d4ra04467c1.pdf [file d4ra04467c1.pdf]

**Supplementary File**

**Self-assembled 3D Flower-like Hierarchical architecture on the thermoelectric  
properties of Ag-doped Bi<sub>2</sub>S<sub>3</sub>**

T. Manimozhi<sup>1\*</sup>, S. Kavirajan<sup>3</sup>, M. Navaneethan<sup>2,3\*</sup>, A. Joseph Sagaya Kennedy<sup>4</sup>

*<sup>1</sup>Department of Physics, Saveetha School of Engineering,*

*Saveetha Institute of Medical and Technical Sciences (SIMATS), Saveetha University,*

*Thandalam, Chennai -602105, India.*

<sup>2</sup>Nanotechnology Research Centre (NRC), SRM Institute of Science and Technology,

Kattankulathur, 603203, Tamil Nadu, India.

<sup>3</sup>Functional Materials and Energy Devices Laboratory, Department of Physics and  
Nanotechnology, SRM Institute of Science and Technology, Kattankulathur-603203, Tamil

Nadu, India.

<sup>4</sup>Department of physics, SRM TRP Engineering college (SRM Group), Irungalur,

Tiruchirappalli - 621105, Tamilnadu, India.

**\*Corresponding Author**

E-mail address: manimozhiavc@gmail.com; m.navaneethan@gmail.com

**Table ES1: Elemental composition of Bi<sub>2</sub>S<sub>3</sub> (S1), 0.01 % of Ag-doped Bi<sub>2</sub>S<sub>3</sub> (S2) and 0.025 % Ag-doped Bi<sub>2</sub>S<sub>3</sub> (S3) samples based on EDS analysis.**

| <b>Samples</b> | <b>Elements</b> | <b>Atom%</b> | <b>Weight%</b> |
|----------------|-----------------|--------------|----------------|
| <b>S1</b>      | S               | 58.35        | 17.69          |
|                | Bi              | 41.65        | 82.31          |
| <b>S2</b>      | S               | 58.60        | 18.02          |
|                | Bi              | 40.36        | 80.90          |
|                | Ag              | 1.05         | 1.08           |
| <b>S3</b>      | S               | 53.55        | 15.39          |
|                | Bi              | 43.78        | 82.02          |
|                | Ag              | 2.67         | 2.58           |

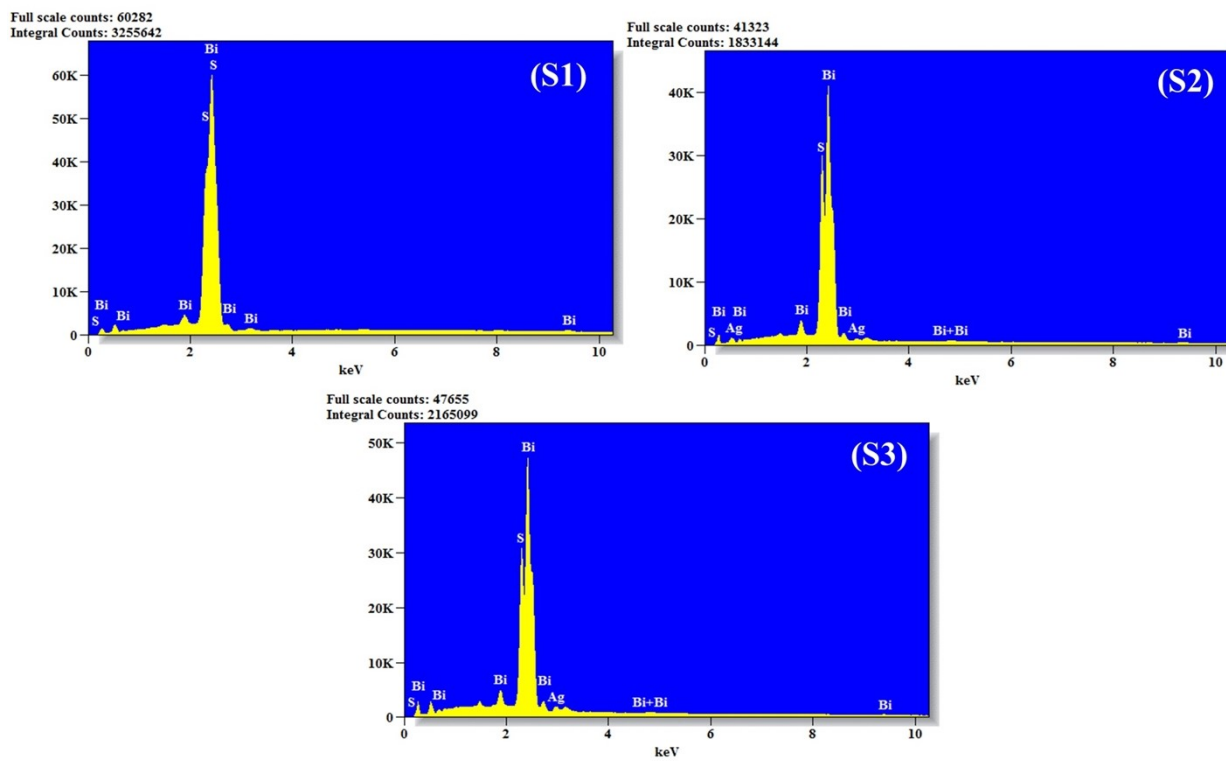

**Fig. ES1 EDS spectra of  $\text{Bi}_2\text{S}_3$  (S1), 0.01 % of Ag-doped  $\text{Bi}_2\text{S}_3$  (S2) and 0.025 % Ag-doped  $\text{Bi}_2\text{S}_3$  (S3) samples.**

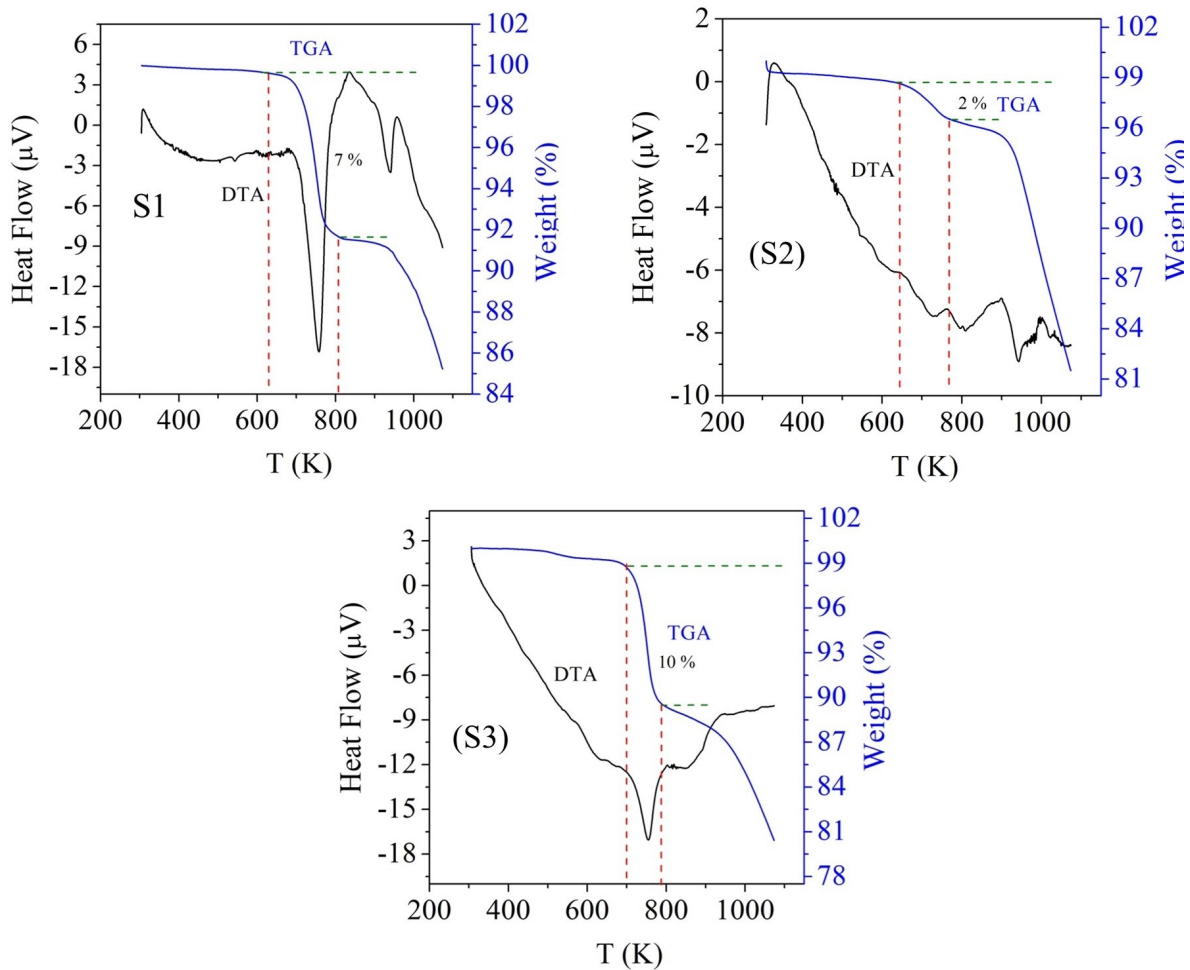

**Fig. ES2: Thermogravimetric analysis (TGA) and differential thermal analysis (DTA) of  $\text{Bi}_2\text{S}_3$  (S1), 0.01% Ag-doped  $\text{Bi}_2\text{S}_3$  (S2), and 0.025% Ag-doped  $\text{Bi}_2\text{S}_3$  (S3) samples.**
